# Supplementary material for: Genomic markers of panitumumab resistance including ERBB2/HER2 in a phase II study of KRAS wild-type (wt) metastatic colorectal cancer (mCRC)
Source: PubMed Central journal article supplement (PMC4951343; doi:10.18632/oncotarget.8006), 2016-03-09
Supplement: oncotarget-07-18953-s001.pdf [file oncotarget-07-18953-s001.pdf]

## Genomic markers of panitumumab resistance including ERBB2/HER2 in a phase II study of KRAS wild-type (wt) metastatic colorectal cancer (mCRC)

### Supplementary Materials

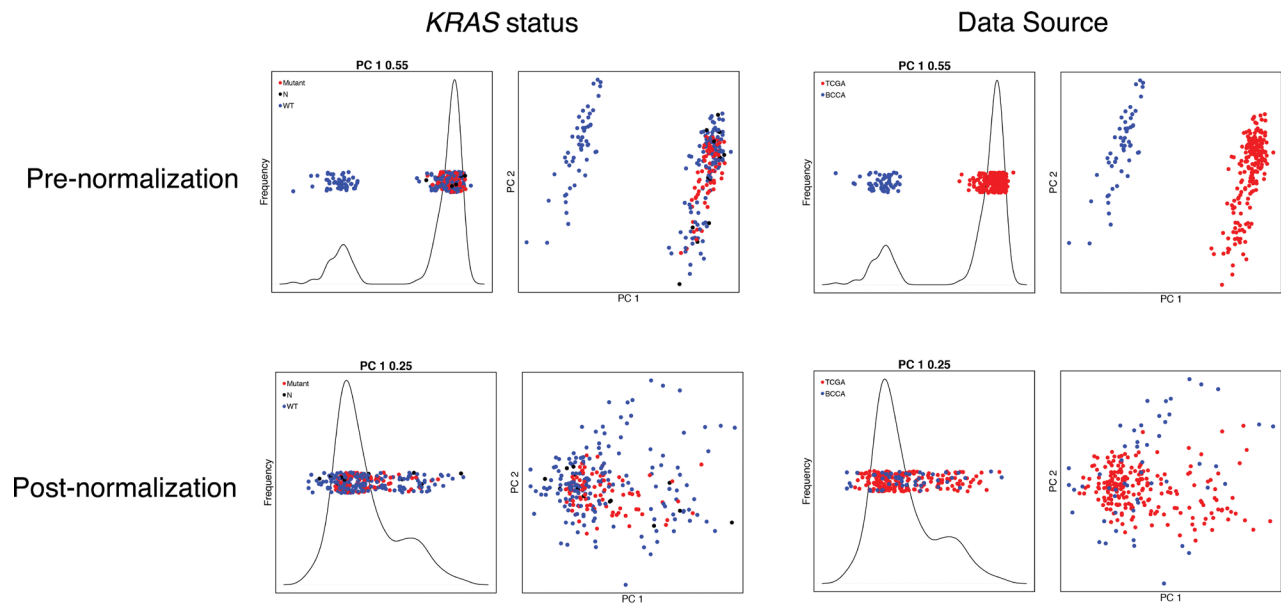

**Supplementary Figure S1: Principal component analysis of the TCGA and BCCA cohorts before and after normalization.** Prior to normalization, the two cohorts occupied non-overlapping dimensional space (top) but merge into the same dimensional space following normalization (bottom). *KRAS* mutant (red) and wt (blue) gene expression was normalized as to become overlapping (left). Data source of BCCA (blue) or TCGA (red) was also normalized to become overlapping (right).

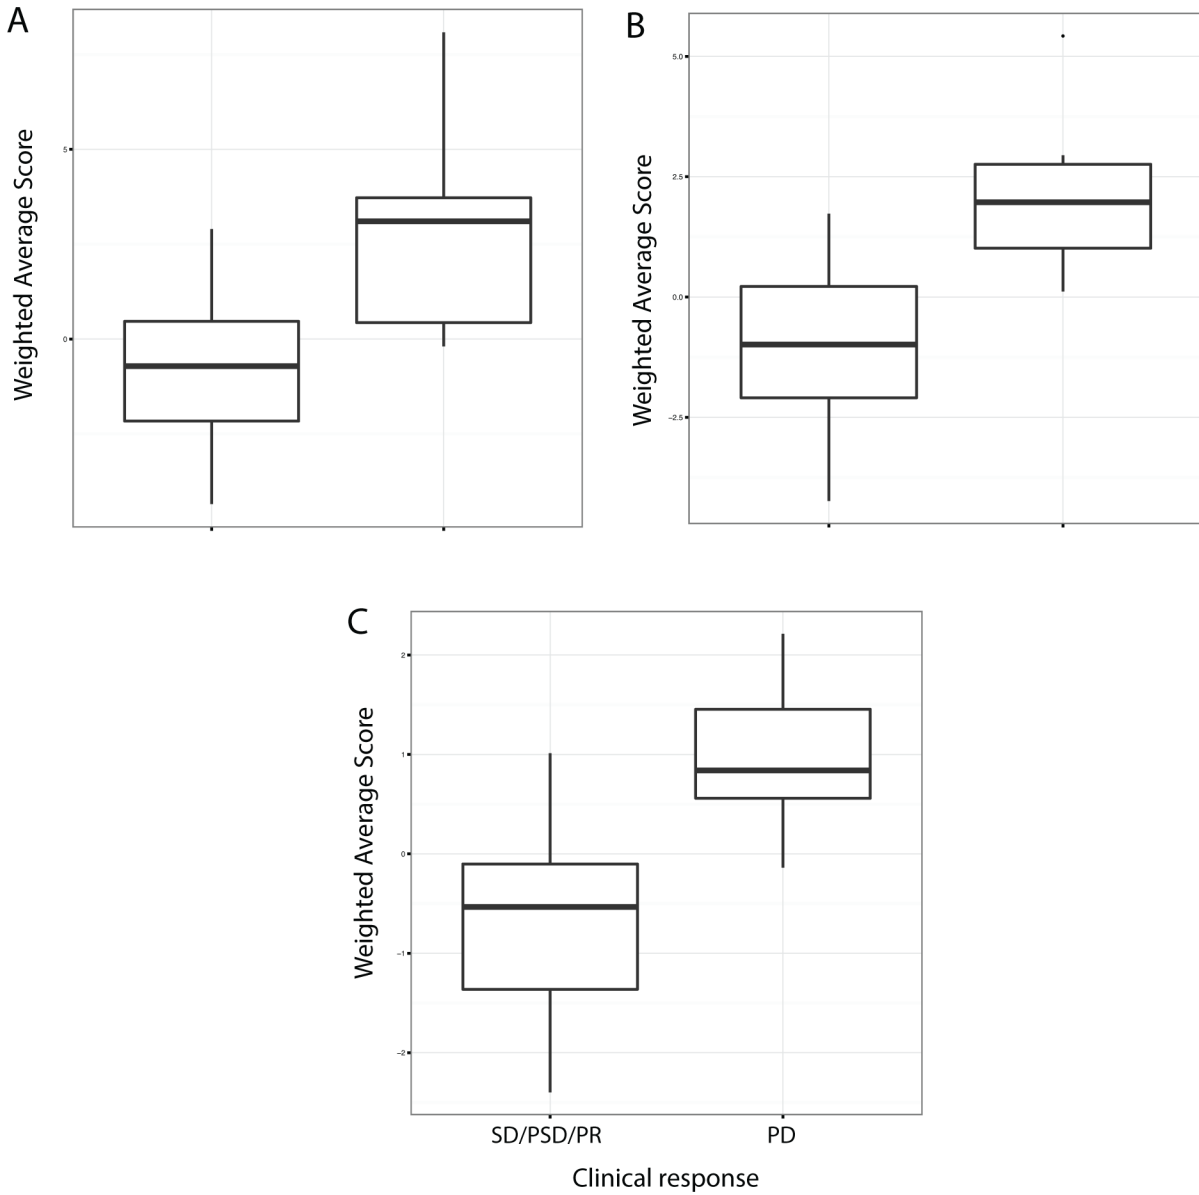

**Supplementary Figure S2: SAM analysis of BCCA expression dataset after gene normalization with the TCGA expression dataset based on 95 genes present in both datasets and with at least 30% of cases demonstrating expression above background.** Cases were ordered by weighted average score of four top ranked genes from low to high. Response to panitumumab shows significant clustering with higher weighted average scores ( $P = 2.86 \times 10^{-8}$ , CI 95% = 1.02–1.89). Non-responders represented patients with progressive disease (black), while responders encompassed stable disease, partial response, and prolonged stable disease (white).

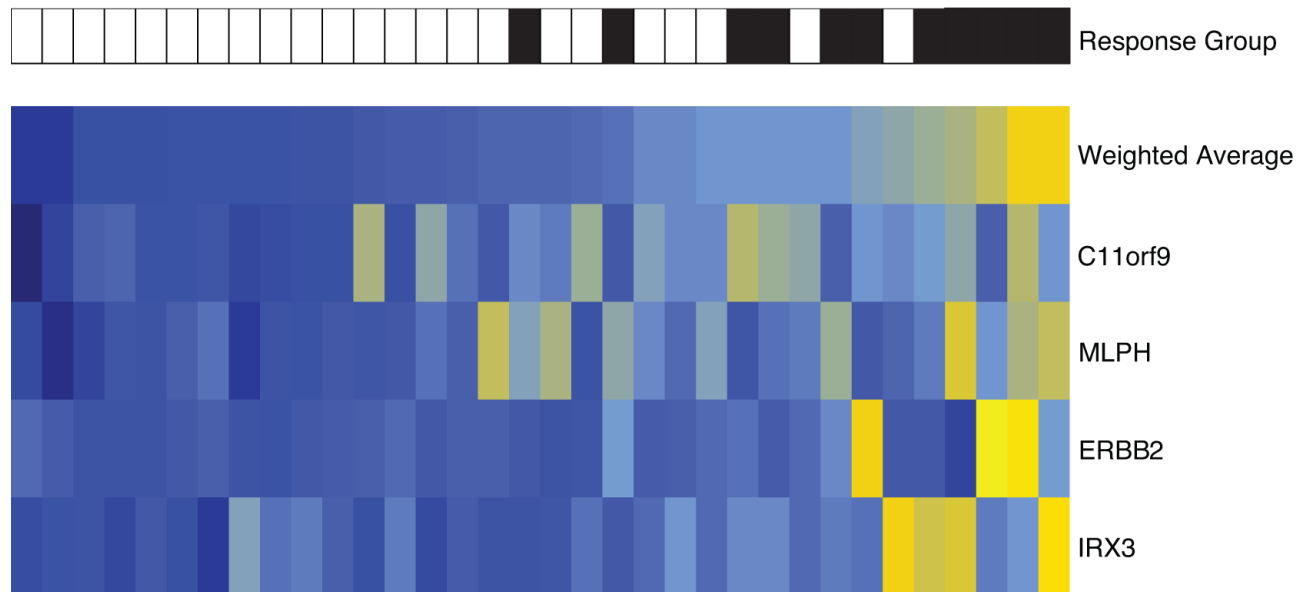

**Supplementary Figure S3: Significance of multi-gene weighted score averages in predicting patients with resistance to panitumumab.** (A) Two-gene weighted average scores of *ERBB2* and *MLPH* displayed borderline association with panitumumab responses of SD/PSD/PR versus PD ( $P = 0.05$ , CI 95% = 0.0015–1.98). (B) Association with response was improved in the five-gene expression signature measuring *ERBB2*, *MLPH*, *IRX3*, *c11orf9*, and *KLK6* ( $P = 0.001$ , CI 95% = 0.597–2.16). (C) Following normalization with the 220-case TCGA cohort, association of a four-gene expression signature with response was very significant ( $P = 2.86 \times 10^{-8}$ , CI 95% = 1.02–1.89). Box halves represent variance of second and third quartiles while lines represent variance of the first and fourth quartiles.

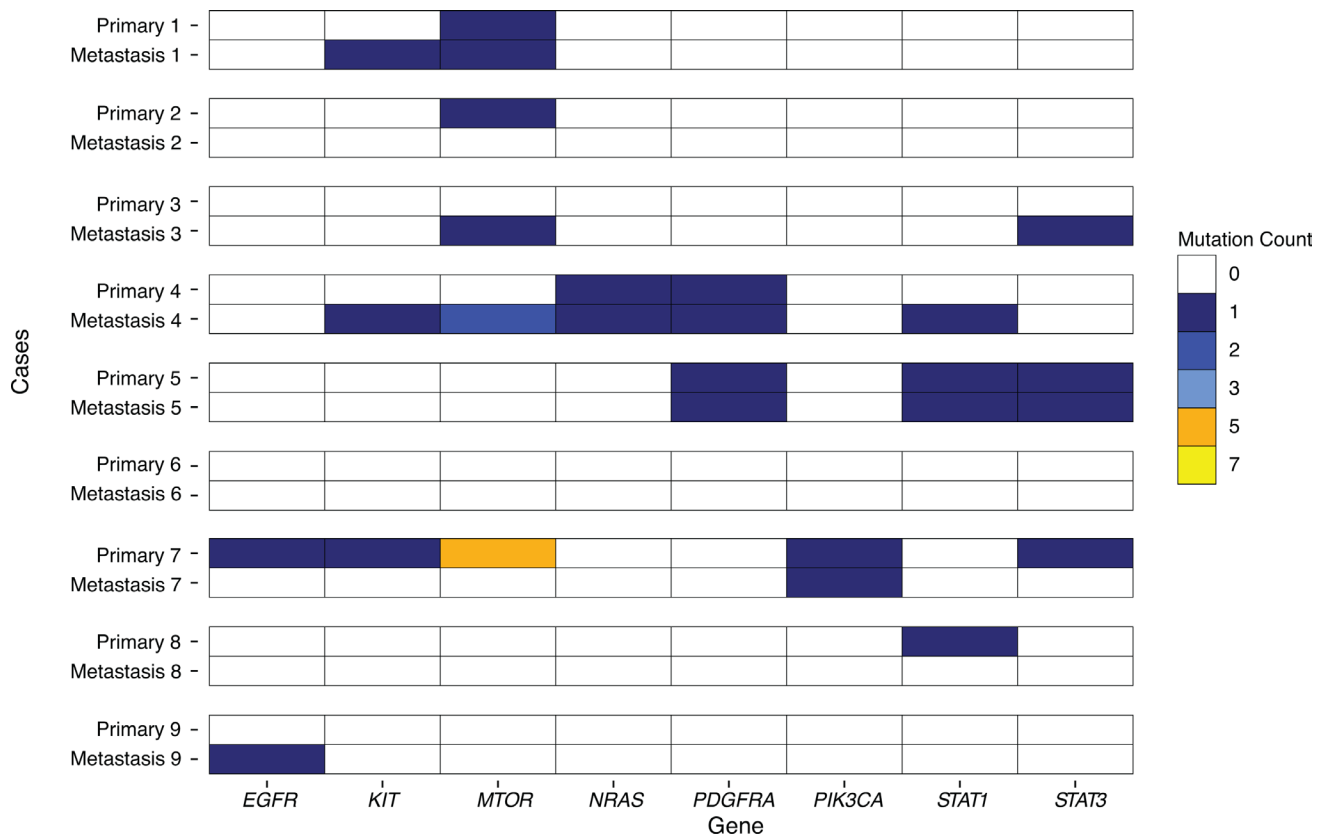

**Supplementary Figure S4: Matched metastatic tumor samples displayed patterns consistent with a subclonal metastases or progressive evolution of tumor mutational status following treatment.** Matched metastatic samples harbored mutations found in primary samples plus additional gene mutations. Metastatic cases 2, 7, and 8 lacked mutations found in the primary tumor samples. Pair 5 had no change between primary and metastatic tumor samples. Note: only genes with mutations in primary/metastatic pairs are shown.

**Supplementary Table S1: List of 132 selected genes included in the nCounter codeset, compiled from gene sets implicated in cetuximab response and BRAF mutant-like expression patterns in other *KRAS* wt mCRC cohorts**

| C13orf18  | OSBP2     | RYK       | MAPK13   |
|-----------|-----------|-----------|----------|
| CTSE      | CFTR      | HMOX1     | RHOB     |
| DDC       | KLK10     | GNB5      | NUDT4    |
| AQP5      | PHYH      | PIK3CA    | ATP2C1   |
| PPP1R14D  | DUSP4     | ELMO1     | GNAS     |
| REG4      | PLCB4     | GPSM2     | CAMK2G   |
| HSF5      | HOXD3     | PTK7      | ITGA6    |
| RSBN1L    | ZNF141    | TNFRSF1A  | P2RY5    |
| SATB2     | C11orf9   | ECOP      | PRKD2    |
| RASSF6    | PPP1R14C  | RAC1      | CC2D1A   |
| TNNC2     | CD55      | RGL2      | TNFRSF1B |
| CRIP1     | FLJ32063  | TNFRSF10B | DNAJC8   |
| GGH       | TRNP1     | PRKCI     | ECSIT    |
| PPPDE2    | APCDD1    | MAPK13    | GOSR2    |
| SPINK1    | FSCN1     | VEGFA     | PPP1R9A  |
| PLK2      | ACOX1     | RHOB      | KLK6     |
| PTPRO     | KIAA0802  | NUDT4     | CRYAB    |
| TM4SF4    | C10orf99  | ATP2C1    | RAD51    |
| ZSWIM1    | PLL       | GNAS      | EGFR     |
| MLPH      | MIR142    | CAMK2G    | ERBB2    |
| RNF43     | IRX3      | ITGA6     | RRAGD    |
| RBM8A     | ARID3A    | P2RY5     | FABP5    |
| CELP      | SLC25A37  | PRKD2     | UCHL1    |
| SOX8      | C20orf111 | CC2D1A    | GAL      |
| CBFA2T2   | PIK3AP1   | TNFRSF1B  | PLOD     |
| PIWIL1    | AMACR     | DNAJC8    | DDIT4    |
| PTPRD     | TPK1      | PTK7      | VEGFA    |
| LOC388199 | AIFM3     | TNFRSF1A  | ADM      |
| CDX2      | ZIC2      | ECOP      | ANGPTL4  |
| S100A16   | CTTNBP2   | RAC1      | NDRG1    |
| TSPAN6    | SERPINB5  | RGL2      | PNP      |
| RBBP8     | DDR1      | TNFRSF10B | SLC16A3  |
| VAV3      | PRDX4     | PRKCI     | C14ORF58 |

Genes implicated in therapeutic resistance and anti-apoptosis have also been included [1–5].

**Supplementary Table S2: Genes and reference sequences targeted by the oncopanel sequencing assay**

| Symbol | NCBI Reference Sequence | Locus Reference Genomic |
|--------|-------------------------|-------------------------|
| HRAS   | NM_005343.2             | LRG_506                 |
| STAT1  | NM_007315.3             | LRG_111                 |
| STAT3  | NM_139276.2             | LRG_112                 |
| BRAF   | NM_004333.4             | LRG_299                 |
| EGFR   | NM_005228.3             | LRG_304                 |
| KIT    | NM_000222.2             | LRG_307                 |
| PDGFRA | NM_006206.4             | LRG_309                 |
| PIK3CA | NM_006218.2             | LRG_310                 |
| PTEN   | NM_000314.4             | LRG_311                 |
| TP53   | NM_000546.5             | LRG_321                 |
| KRAS   | NM_033360.2             | LRG_344                 |
| ALK    | NM_004304.3             | LRG_488                 |
| AKT1   | NM_001014431.1          | LRG_721                 |
| ERBB2  | NM_001005862.1          | LRG_724                 |
| MAP2K1 | NM_002755.3             | LRG_725                 |
| MTOR   | NM_004958.3             | LRG_734                 |
| NRAS   | NM_002524.3             | LRG_92                  |
| IDH1   | NM_005896.2             | LRG_610                 |
| IDH2   | NM_002168.2             | LRG_611                 |
| MAPK1  | NM_002745.4             | LRG_786                 |

**REFERENCES**

1. Tennstedt P, Fresow R, Simon R, Marx A, Terracciano L, Petersen C, Sauter G, Dikomey E, Borgmann K. RAD51 overexpression is a negative prognostic marker for colorectal adenocarcinoma. *Int J Cancer*. 2013; 132:2118–2126.
2. Ruan Q, Han S, Jiang WG, Boulton ME, Chen ZJ, Law BK, Cai J. alphaB-crystallin, an effector of unfolded protein response, confers anti-VEGF resistance to breast cancer via maintenance of intracrine VEGF in endothelial cells. *Mol Cancer Res*. 2011; 9:1632–1643.
3. Tsang JY, Lai MW, Wong KH, Chan SK, Lam CC, Tsang AK, Yu AM, Tan PH, Tse GM. alphaB-crystallin is a useful marker for triple negative and basal breast cancers. *Histopathology*. 2012; 61:378–386.
4. Yonesaka K, Zejnullahu K, Okamoto I, Satoh T, Cappuzzo F, Souglakos J, Ercan D, Rogers A, Roncalli M, Takeda M, Fujisaka Y, Philips J, Shimizu T, et al. Activation of ERBB2 signaling causes resistance to the EGFR-directed therapeutic antibody cetuximab. *Sci Transl Med*. 2011; 3:3002442.
5. Martin V, Landi L, Molinari F, Fountzilias G, Geva R, Riva A, Saletti P, De Dosso S, Spitale A, Tejpar S, Kalogeras KT, Mazzucchelli L, Frattini M, et al. HER2 gene copy number status may influence clinical efficacy to anti-EGFR monoclonal antibodies in metastatic colorectal cancer patients. *Br J Cancer*. 2013; 108:668–675.
